# Supplementary figures and images for: PLPBP mutations cause variable phenotypes of developmental and epileptic encephalopathy
Source: PubMed Central journal article supplement — Epilepsia Open. 2018 Nov 1;3(4):495–502. doi: 10.1002/epi4.12272 (PMC6276781; doi:10.1002/epi4.12272), 2018-11-01

# Supporting Figure 1

A

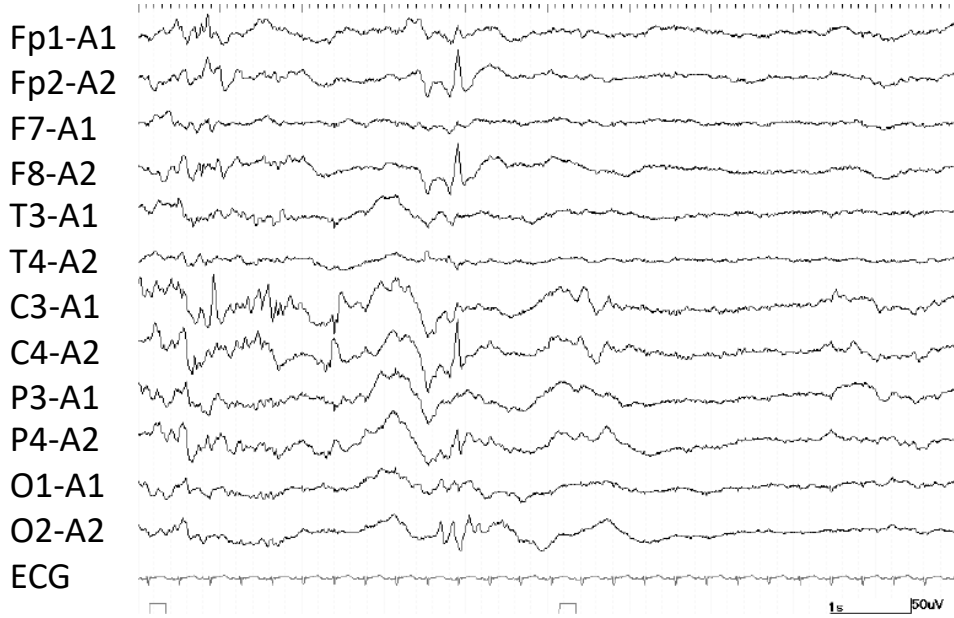

B

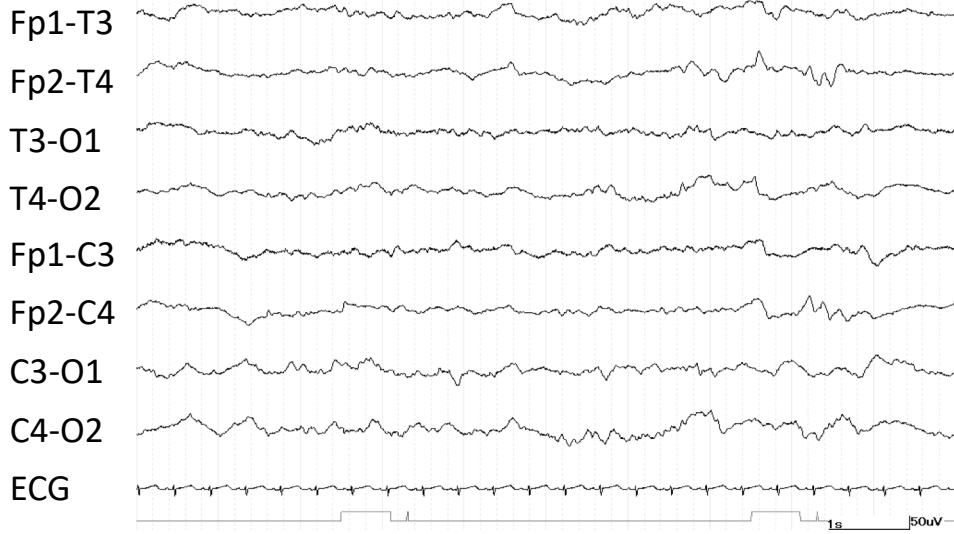

C

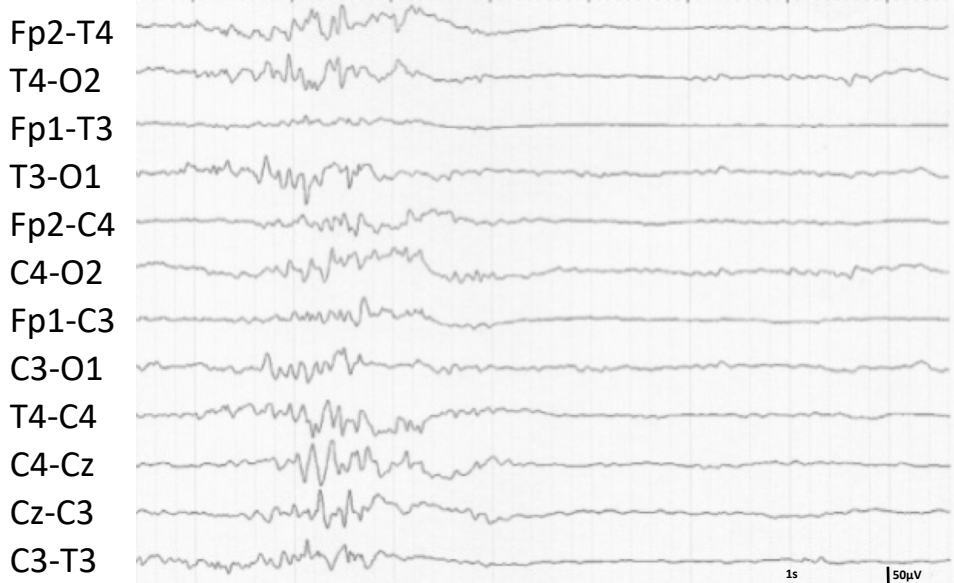

Supporting Figure 2

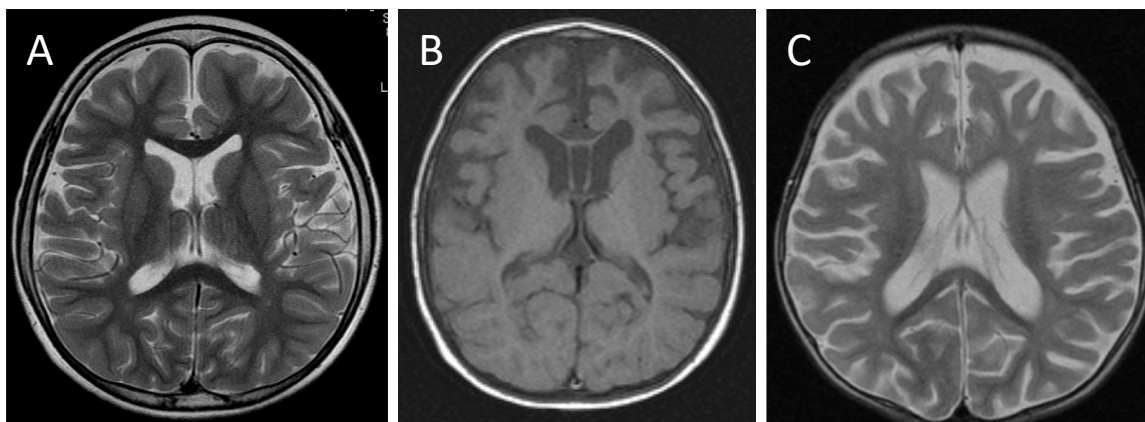

Supplement: EPI4-3-495-s002.pdf [file EPI4-3-495-s002.pdf]
